# Supplementary material for: Global gene expression analysis provides insight into local adaptation to geothermal streams in tadpoles of the Andean toad Rhinella spinulosa
Source: PubMed Central journal article supplement (PMC5434060; doi:10.1038/s41598-017-01982-z), 2017-05-16
Supplement: 41598_2017_1982_MOESM7_ESM.pdf [file 41598_2017_1982_MOESM7_ESM.pdf]

**Global gene expression analysis provides insight into local adaptation to geothermal streams in tadpoles of the Andean toad *Rhinella spinulosa***

Luis Pastenes<sup>1,2</sup>, Camilo Valdivieso<sup>1,3</sup>, Alex Di Genova<sup>1,4</sup>, Dante Travisany<sup>1,4</sup>, Andrew Hart<sup>4</sup>,  
Martín Montecino<sup>1,5</sup>, Ariel Orellana<sup>1</sup>, Mauricio Gonzalez<sup>1,6</sup>, Rodrigo A. Gutiérrez<sup>1</sup>, Miguel L.  
Allende<sup>1,7</sup>, Alejandro Maass<sup>1,4,8</sup> & Marco A. Méndez<sup>1,3,9,\*</sup>

## SUPPLEMENTARY INFORMATION

### Supplementary Tables:

**Table S1.** Summary of the results of the RNA sequencing and *de novo* assembled transcriptome for *Rhinella spinulosa*.

|                                      | <b>Final assembly</b> |
|--------------------------------------|-----------------------|
| Total number of reads (millions)     | 1,761.6               |
| Read length (bp)                     | 101                   |
| Total length of reads (Gb)           | 177.9                 |
| Total length of assembly (Mb)        | 82.3                  |
| Percentage sequences of assembly (%) | 79.2                  |
| N50 length of assembly (bp)          | 1,936                 |
| Mean length of transcripts (bp)      | 1,252                 |
| Median length of transcripts (bp)    | 743                   |
| Total number of transcripts          | 65,762                |
| Transcripts annotated                | 20,947                |

**Table S2.** Total number of reads resulting from the 36 cDNA libraries sequenced. The total number of reads is shown for each experimental condition, both before (total pairs) and after (pass filter) the trimming process. These include the singlets, forward and reverse reads.

| <b>Experimental conditions</b> | <b>Total pairs</b> | <b>Pass filter pairs</b> | <b>Pass filter singlets</b> | <b>Pass filter forward</b> | <b>Pass filter reverse</b> |
|--------------------------------|--------------------|--------------------------|-----------------------------|----------------------------|----------------------------|
| CAT20G36(1)                    | 28,975,309         | 27,928,398               | 947,105                     | 703,416                    | 243,689                    |
| CAT20G36(2)                    | 20,120,514         | 19,566,618               | 516,385                     | 376,042                    | 140,343                    |
| CAT20G36(3)                    | 19,893,759         | 19,322,012               | 531,090                     | 385,147                    | 145,943                    |
| CAT20G42(1)                    | 37,088,766         | 35,668,443               | 1,308,905                   | 912,323                    | 396,582                    |
| CAT20G42(2)                    | 19,333,620         | 18,736,917               | 554,015                     | 400,035                    | 153,980                    |
| CAT20G42(3)                    | 16,358,617         | 15,784,950               | 531,096                     | 374,388                    | 156,708                    |
| CAT25G36(1)                    | 42,370,880         | 40,673,256               | 1,514,671                   | 1,085,870                  | 428,801                    |
| CAT25G36(2)                    | 21,241,098         | 20,612,726               | 586,639                     | 429,165                    | 157,474                    |
| CAT25G36(3)                    | 17,834,333         | 17,305,785               | 494,354                     | 367,448                    | 126,906                    |
| CAT25G42(1)                    | 33,512,084         | 32,354,950               | 1,062,731                   | 715,411                    | 347,320                    |
| CAT25G42(2)                    | 19,480,898         | 18,806,609               | 636,773                     | 473,203                    | 163,570                    |
| CAT25G42(3)                    | 21,368,003         | 20,702,739               | 621,593                     | 453,156                    | 168,437                    |
| FAR20G36(1)                    | 28,098,598         | 26,942,142               | 1,053,549                   | 776,678                    | 276,871                    |
| FAR20G36(2)                    | 22,210,026         | 21,582,335               | 583,353                     | 420,468                    | 162,885                    |
| FAR20G36(3)                    | 17,036,683         | 16,478,704               | 520,275                     | 383,433                    | 136,842                    |
| FAR20G42(1)                    | 34,727,434         | 33,662,917               | 984,069                     | 652,928                    | 331,141                    |
| FAR20G42(2)                    | 18,957,500         | 18,265,742               | 645,805                     | 458,856                    | 186,949                    |
| FAR20G42(3)                    | 21,645,300         | 20,911,108               | 688,690                     | 514,080                    | 174,610                    |
| FAR25G36(1)                    | 36,392,396         | 35,071,891               | 1,207,621                   | 848,681                    | 358,940                    |
| FAR25G36(2)                    | 18,235,964         | 17,599,458               | 591,354                     | 437,994                    | 153,360                    |
| FAR25G36(3)                    | 18,865,067         | 18,298,563               | 531,378                     | 391,038                    | 140,340                    |
| FAR25G42(1)                    | 34,787,863         | 33,669,651               | 1,031,243                   | 693,798                    | 337,445                    |
| FAR25G42(2)                    | 20,775,599         | 19,990,093               | 734,610                     | 529,990                    | 204,620                    |
| FAR25G42(3)                    | 17,840,840         | 17,270,884               | 531,291                     | 383,285                    | 148,006                    |
| TAT20G36(1)                    | 34,647,200         | 33,110,285               | 1,365,224                   | 969,683                    | 395,541                    |
| TAT20G36(2)                    | 20,937,377         | 20,380,109               | 519,431                     | 373,926                    | 145,505                    |
| TAT20G36(3)                    | 19,867,133         | 19,322,967               | 506,504                     | 372,635                    | 133,869                    |
| TAT20G42(1)                    | 30,139,828         | 29,015,346               | 1,011,817                   | 718,615                    | 293,202                    |
| TAT20G42(2)                    | 20,678,674         | 20,050,216               | 584,232                     | 415,173                    | 169,059                    |
| TAT20G42(3)                    | 19,000,686         | 18,428,164               | 534,520                     | 381,677                    | 152,843                    |
| TAT25G36(1)                    | 35,076,239         | 33,632,975               | 1,308,133                   | 926,773                    | 381,360                    |
| TAT25G36(2)                    | 20,102,632         | 19,509,561               | 551,607                     | 392,048                    | 159,559                    |
| TAT25G36(3)                    | 20,213,331         | 19,565,042               | 601,723                     | 432,016                    | 169,707                    |
| TAT25G42(1)                    | 31,772,768         | 30,629,011               | 1,033,039                   | 732,672                    | 300,367                    |
| TAT25G42(2)                    | 18,665,254         | 18,104,744               | 525,485                     | 383,583                    | 141,902                    |
| TAT25G42(3)                    | 22,557,028         | 21,937,403               | 579,405                     | 426,413                    | 152,992                    |
| <b>Total</b>                   | <b>880,809,301</b> | <b>850,892,714</b>       | <b>27,529,715</b>           | <b>19,692,047</b>          | <b>7,837,668</b>           |

**Table S3.** Total number of filtered and mapped reads for the 36 experimental conditions. These include forward, reverse and paired reads, as well as the overall read mapping and concordant pair alignment rates.

| Experimental conditions | Total pairs        | Mapped forward     | Mapped reverse     | Mapped pairs       | Overall read mapping rate (%) | Concordant pair alignment rate (%) |
|-------------------------|--------------------|--------------------|--------------------|--------------------|-------------------------------|------------------------------------|
| CAT20G36(1)             | 27,928,398         | 22,515,045         | 22,436,706         | 20,412,351         | 80.5                          | 72.4                               |
| CAT20G36(2)             | 19,566,618         | 15,808,607         | 15,826,055         | 15,031,787         | 80.8                          | 76.7                               |
| CAT20G36(3)             | 19,322,012         | 15,512,062         | 15,523,688         | 14,678,529         | 80.3                          | 75.9                               |
| CAT20G42(1)             | 35,668,443         | 28,462,682         | 28,382,262         | 25,709,558         | 79.7                          | 70.9                               |
| CAT20G42(2)             | 18,736,917         | 15,035,048         | 15,056,284         | 14,280,474         | 80.3                          | 76.1                               |
| CAT20G42(3)             | 15,784,950         | 12,871,018         | 12,891,571         | 12,256,130         | 81.6                          | 77.5                               |
| CAT25G36(1)             | 40,673,256         | 32,490,346         | 32,355,852         | 29,024,159         | 79.7                          | 70.5                               |
| CAT25G36(2)             | 20,612,726         | 16,405,499         | 16,427,714         | 15,561,201         | 79.6                          | 75.4                               |
| CAT25G36(3)             | 17,305,785         | 13,996,733         | 14,017,691         | 13,329,757         | 80.9                          | 76.9                               |
| CAT25G42(1)             | 32,354,950         | 25,703,894         | 25,660,876         | 23,250,623         | 79.4                          | 70.8                               |
| CAT25G42(2)             | 18,806,609         | 15,025,113         | 15,054,349         | 14,259,766         | 80                            | 75.7                               |
| CAT25G42(3)             | 20,702,739         | 16,524,163         | 16,552,595         | 15,688,818         | 79.9                          | 75.7                               |
| FAR20G36(1)             | 26,942,142         | 20,610,947         | 20,529,417         | 17,838,563         | 76.4                          | 65.3                               |
| FAR20G36(2)             | 21,582,335         | 16,215,973         | 16,252,426         | 15,018,572         | 75.2                          | 69.5                               |
| FAR20G36(3)             | 16,478,704         | 12,418,830         | 12,450,435         | 11,384,633         | 75.5                          | 69.0                               |
| FAR20G42(1)             | 33,662,917         | 25,345,993         | 25,344,617         | 22,196,234         | 75.3                          | 65.4                               |
| FAR20G42(2)             | 18,265,742         | 13,861,159         | 13,905,631         | 12,816,129         | 76                            | 70.1                               |
| FAR20G42(3)             | 20,911,108         | 15,629,513         | 15,671,596         | 14,460,096         | 74.8                          | 69.1                               |
| FAR25G36(1)             | 35,071,891         | 26,514,025         | 26,463,804         | 23,042,816         | 75.5                          | 64.9                               |
| FAR25G36(2)             | 17,599,458         | 13,274,447         | 13,314,862         | 12,247,760         | 75.5                          | 69.5                               |
| FAR25G36(3)             | 18,298,563         | 13,837,279         | 13,875,838         | 12,840,499         | 75.7                          | 70.1                               |
| FAR25G42(1)             | 33,669,651         | 25,612,349         | 25,597,513         | 22,452,622         | 76.1                          | 66.0                               |
| FAR25G42(2)             | 19,990,093         | 15,400,623         | 15,446,449         | 14,318,102         | 77.2                          | 71.6                               |
| FAR25G42(3)             | 17,270,884         | 13,047,526         | 13,086,089         | 12,096,674         | 75.7                          | 69.9                               |
| TAT20G36(1)             | 33,110,285         | 26,707,607         | 26,626,774         | 24,068,936         | 80.5                          | 71.5                               |
| TAT20G36(2)             | 20,380,109         | 16,717,665         | 16,732,698         | 15,949,366         | 82.1                          | 78.2                               |
| TAT20G36(3)             | 19,322,967         | 15,669,693         | 15,683,865         | 14,845,980         | 81.1                          | 76.7                               |
| TAT20G42(1)             | 29,015,346         | 23,375,848         | 23,325,455         | 20,977,018         | 80.5                          | 71.5                               |
| TAT20G42(2)             | 20,050,216         | 16,304,895         | 16,330,244         | 15,513,854         | 81.4                          | 77.2                               |
| TAT20G42(3)             | 18,428,164         | 14,919,046         | 14,941,834         | 14,204,358         | 81                            | 76.9                               |
| TAT25G36(1)             | 33,632,975         | 27,963,540         | 27,884,801         | 25,732,973         | 83                            | 75.8                               |
| TAT25G36(2)             | 19,509,561         | 15,975,422         | 15,994,754         | 15,242,394         | 81.9                          | 78.0                               |
| TAT25G36(3)             | 19,565,042         | 16,133,812         | 16,152,313         | 15,383,554         | 82.5                          | 78.5                               |
| TAT25G42(1)             | 30,629,011         | 24,569,964         | 24,520,998         | 22,407,288         | 80.1                          | 72.4                               |
| TAT25G42(2)             | 18,104,744         | 14,718,491         | 14,740,339         | 14,020,157         | 81.4                          | 77.3                               |
| TAT25G42(3)             | 21,937,403         | 18,068,868         | 18,087,377         | 17,192,798         | 82.4                          | 78.3                               |
| <b>Total</b>            | <b>850,892,714</b> | <b>673,243,725</b> | <b>673,145,772</b> | <b>619,734,529</b> | <b>-</b>                      | <b>-</b>                           |

**Table S4.** List of differentially expressed genes from El Tatio. (Submitted as Excel file)

**Table S5.** List of differentially expressed genes from Catarpe. (Submitted as Excel file)

**Table S6.** List of genes with positive selection detected in the samples from El Tatio. The total number of SNPs and their effects are also shown. (Submitted as Excel file)

**Table S7.** List of genes with positive selection detected in the samples from Catarpe. The total number of SNPs and their effects are also shown. (Submitted as Excel file)

**Table S8.** Gene enrichment for the DE genes detected in the samples from Catarpe. (Submitted as Excel file)

**Table S9.** List of DE genes and with positive selection for the localities from El Tatio and Catarpe. (Submitted as Excel file)

#### **Supplementary Figures (Legends):**

**Figure S1.** Boxplot of the normalized library sizes (RLE method) for the 35 assembled transcriptomes of *Rhinella spinulosa*. The Y-axis shows the counts per million (CPM) mapped reads for each replicate of the twelve experimental conditions.

CPM

0 5 10 15 20

CAT20G36(1)  
CAT20G36(2)  
CAT20G36(3)  
CAT20G42(1)  
CAT20G42(2)  
CAT20G42(3)  
CAT25G36(1)  
CAT25G36(2)  
CAT25G36(3)  
CAT25G42(1)  
CAT25G42(2)  
CAT25G42(3)  
FAR20G36(1)  
FAR20G36(2)  
FAR20G36(3)  
FAR20G42(1)  
FAR20G42(2)  
FAR20G42(3)  
FAR25G36(1)  
FAR25G36(2)  
FAR25G36(3)  
FAR25G42(1)  
FAR25G42(2)  
FAR25G42(3)  
TAT20G36(1)  
TAT20G36(2)  
TAT20G36(3)  
TAT20G42(2)  
TAT20G42(3)  
TAT25G36(1)  
TAT25G36(2)  
TAT25G36(3)  
TAT25G42(1)  
TAT25G42(2)  
TAT25G42(3)

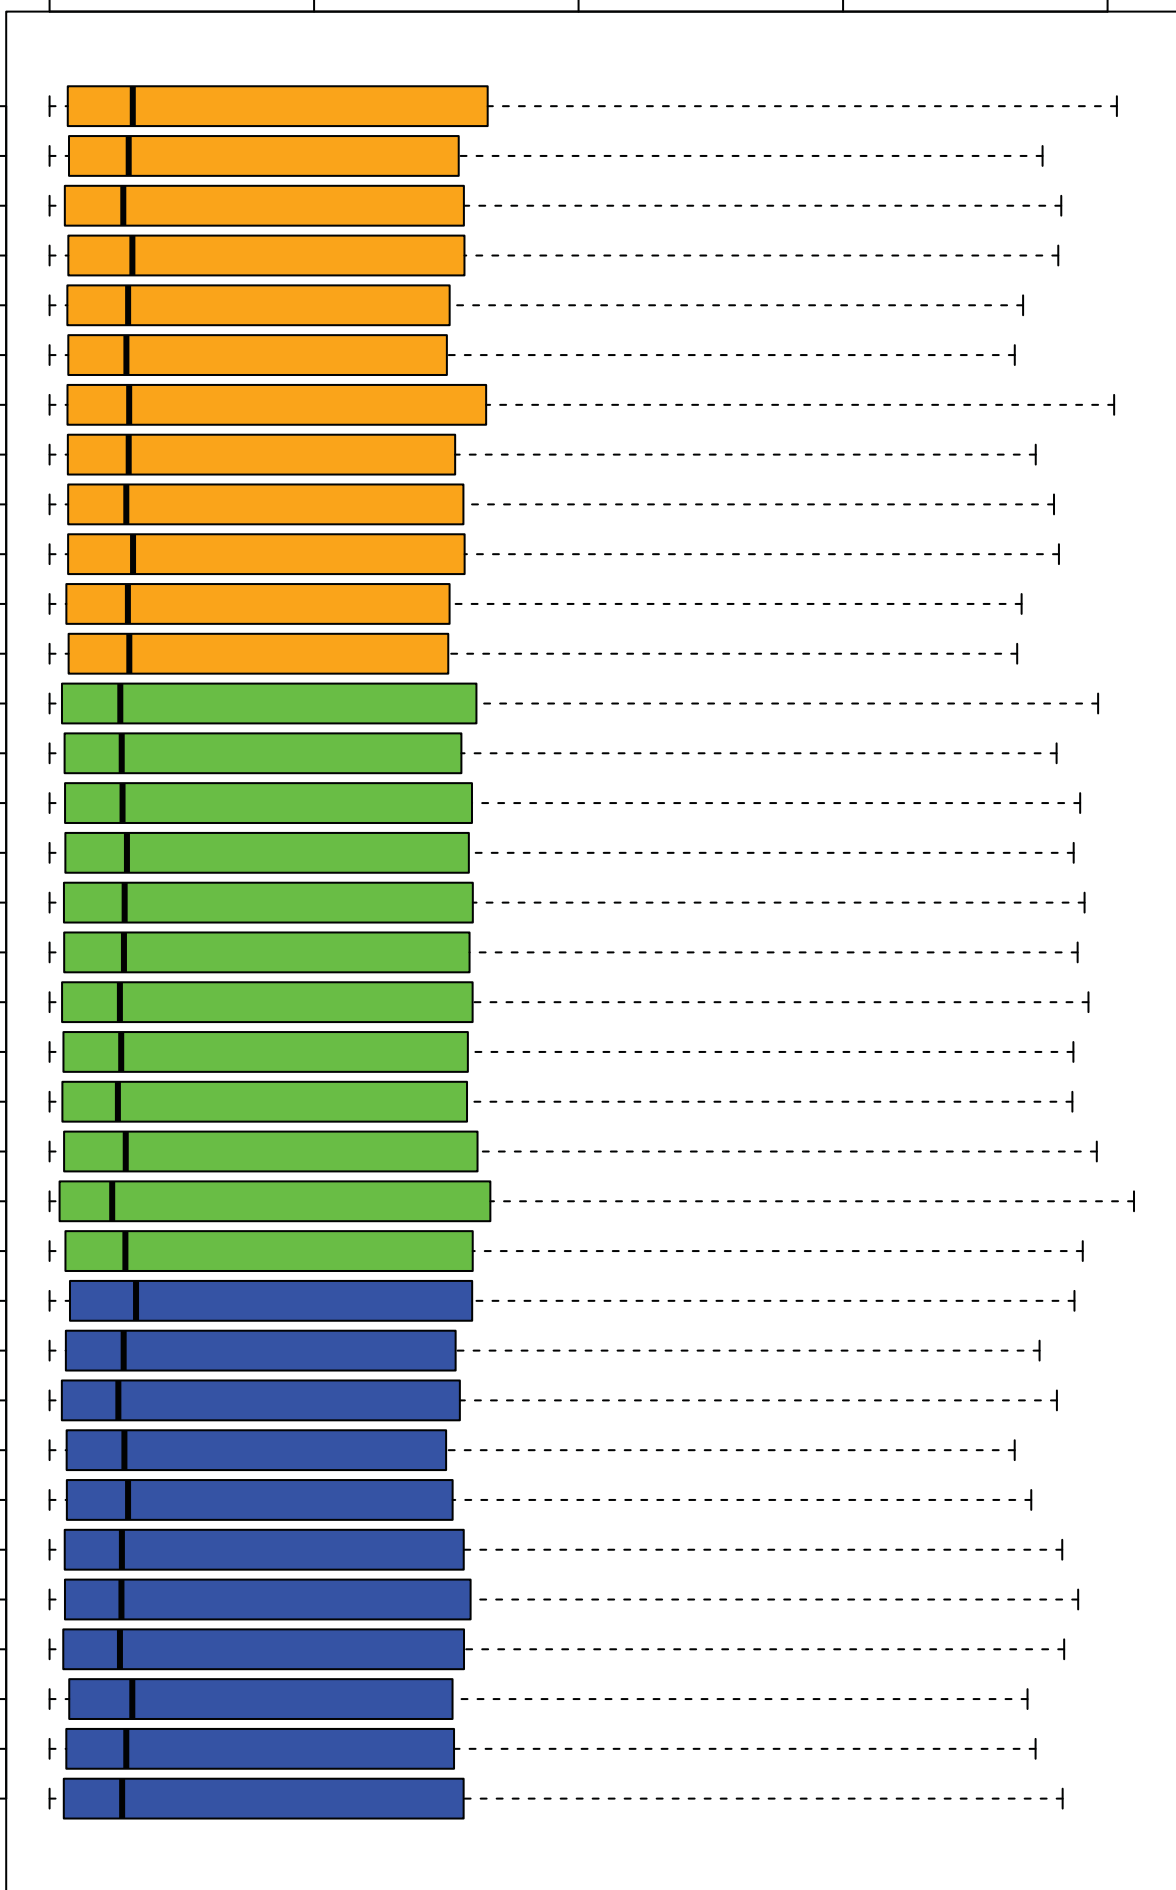

Normalized lib sizes (RLE)
